# Supplementary material for: Fabrication of a dual-fluorescent hybrid material based on post-modification of covalent organic frameworks for the detection of herbicides and the design of a smartphone sensing platform
Source: Royal Society of Chemistry journal article supplement (doi:10.1039/d3tc04152b), 2023-12-13
Supplement: d3tc04152b1.pdf [file d3tc04152b1.pdf]

## Electronically supporting information

# Fabrication of dual-fluorescent hybrid material based on post-modification of covalent organic frameworks for the detection of herbicides and the design of a smartphone sensing platform

*Xiaoqin Shen, Bing Yan\**

*School of Chemical Science and Engineering, Tongji University, Siping Road 1239, Shanghai 200092, China.*

### 1. Experimental Section

---

\* Corresponding author: Email address: [byan@tongji.edu.cn](mailto:byan@tongji.edu.cn) (Bing Yan)

## 1.1. Materials

Tb(NO<sub>3</sub>)<sub>3</sub>·6H<sub>2</sub>O was prepared by dissolving Tb<sub>2</sub>O<sub>3</sub> into excess nitric acid with continuous magnetic stirring, followed by evaporation and crystallization several times. All the other solvents and reagents were obtained commercially and used without further purification. Deionized water was used throughout the experiments. 2,4,6-Triformylphloroglucinol (Tp) (98%), 4,4',4''-(1,3,5-triazine-2,4,6-triyl)trianiline (Tta) (98%), 2,2':6',2''-terpyridine (Terpy) (98%), Glyphosate (Gly) (96%), glufosinate (Glu) (97%), aminomethylphosphonic acid (AMPA) (99%), falisilvan (98%), rimsulfuron (96%), nicosulfuron (95%), alidochlor (97%), polyvinylidene fluoride (PVDF) were purchased from Adamas-beta. NaHCO<sub>3</sub> (99%), NaCl (99%), KCl (99%), MgCl<sub>2</sub> (99%), CaCl<sub>2</sub> (96%), Na<sub>2</sub>SO<sub>4</sub> (99%) were purchased from Sigma-Aldrich. Falisilvan (98%), flumioxazin (99%), flusilazole (98%), tepraloxym (99%), 2,3-dichlorophenoxyacetic (98%) were purchased from Aladdin Chemistry. NaNO<sub>3</sub> (99%), 1,4-dioxane (99.5%), *N, N*-dimethylformamide (99.5%) and dichloromethane (99.8%) were purchased from Greagent.

## 1.2. Instruments

The powder X-ray diffraction (PXRD) patterns were recorded on Bruker D8 ADVANCE diffractometer employing Cu K $\alpha$  radiation (40 mA and 40 kV) with a 2 $\theta$  range from 3° to 45° at room temperature. The surface morphology and EDS analysis were performed on Hitachi S-4800 field emission scanning electron microscope (SEM) with a voltage of 5 kV-15 kV. Fourier transform infrared (FT-IR) spectra were obtained by a Nexus 912 AO446 infrared spectrum radiometer in the wavenumber range of 4000 - 400 cm<sup>-1</sup>. X-ray photoelectron spectroscopy (XPS) spectra were noted under the ultrahigh vacuum (< 10<sup>-6</sup> Pa) at pass energy (93.90 eV) with Axis Ultra DLD spectrometer (Kratos, Japan) by employing an Mg K $\alpha$  (1253.6 eV) anode. Thermogravimetric (TG) curves were measured on a TA TGA 55 system operating at a heating rate of 10 °C/min in the range of 25 °C up

to 800 °C under N<sub>2</sub> atmosphere. The fluorescence spectra were obtained on an Edinburgh FLS920 spectrophotometer employing 450 W xenon lamp as the source of excitation with appropriate cutoff filter. The Commission International de l'Eclairage (CIE) coordinate were calculated by CIE1931 chromaticity coordinate calculation according to the fluorescence emission spectra. The UV-vis absorption spectra were carried on an Agilent 8453 spectrometer. The pH values of aqueous solutions were determined by an INESA PHS-25 pH meter with an E-201F pH composite electrode, which was carefully calibrated by standard buffer solution before testing. The HOMO-LUMO orbital energies were optimized by the B3LYP hybrid density functional and the basis set was 6-31G (d).

### **1.3. Synthesis of TpTta**

TpTta were synthesized according to the previous report.<sup>S1</sup> Briefly, Tp (0.15 mmol), Tta (0.15 mmol), 3 mL of dioxane and 0.25 mL of 6 M aqueous acetic acid was mixed in a 10 mL Schlenk tube. After sonicated for 10 min, the tube was degassed by three freeze-pump-thaw cycles and sealed off. Upon warming to room temperature, the tube was placed in an oven at 120 °C and left undisturbed for 3 days. The precipitate was collected by centrifugation and washed with DMF thrice and DCM twice. The collected powder was dried in vacuum overnight.

## **2. Supporting Figures and Tables**

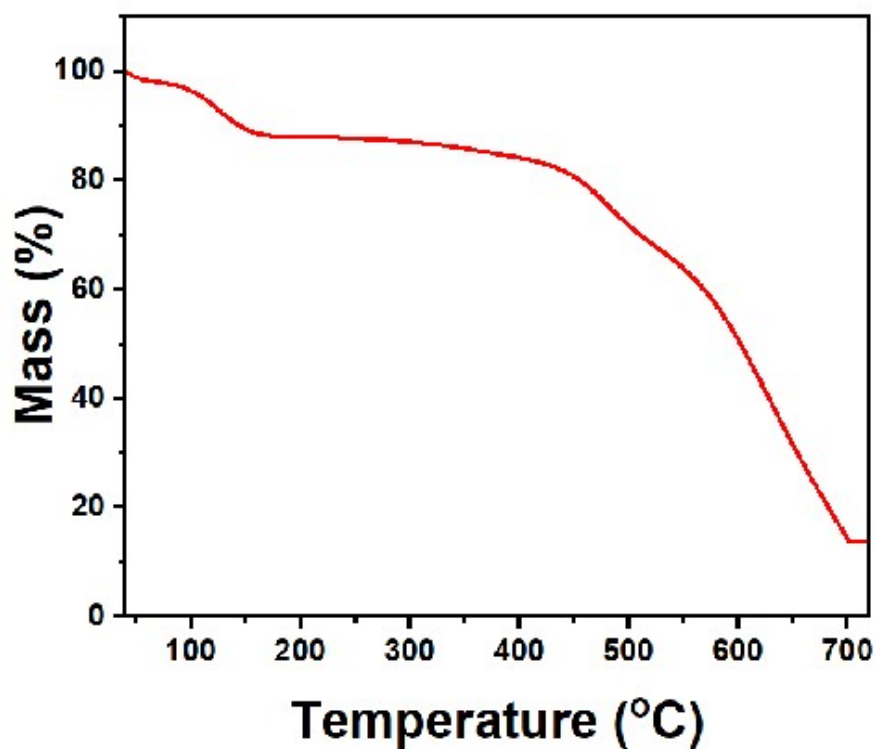

Fig. S1 TGA analysis of TpTta.

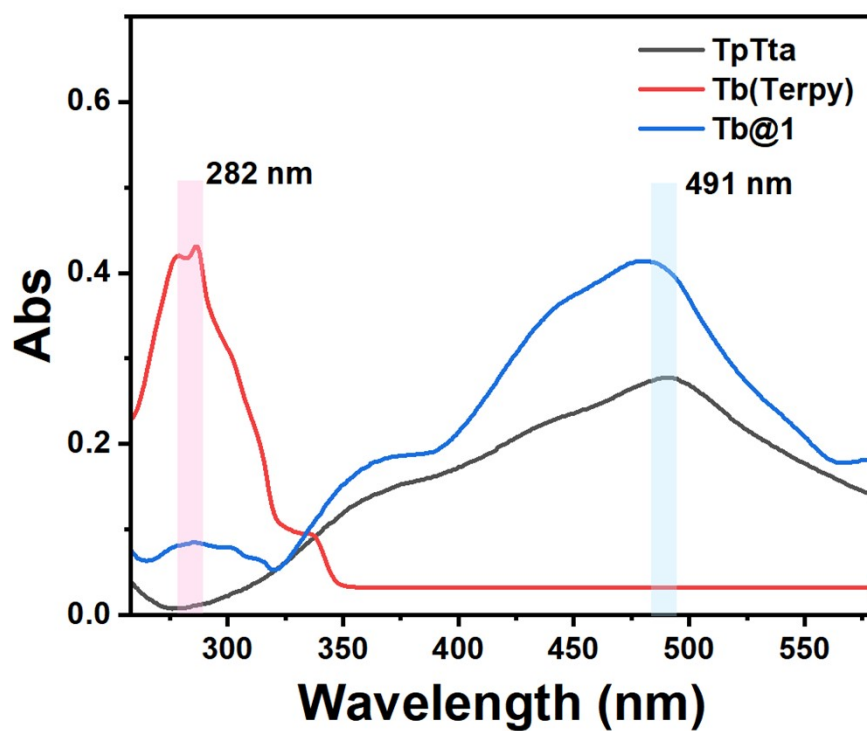

Fig. S2 The UV-vis spectra of TpTta, Tb(Terpy) and Tb@1.

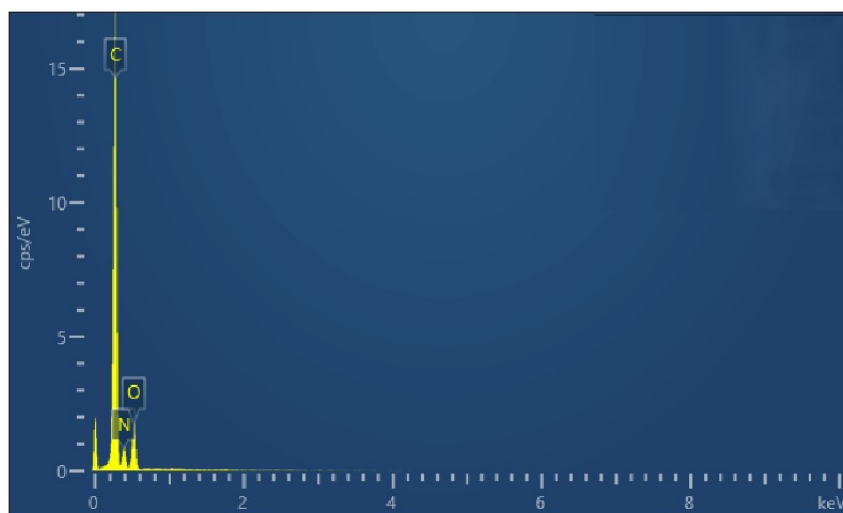

| Element | Wt % | Wt% Sigma |
|---------|------|-----------|
| C       | 74.0 | 0.8       |
| N       | 12.9 | 0.9       |
| O       | 13.2 | 0.5       |

**Fig. S3** EDS analysis of TpTta.

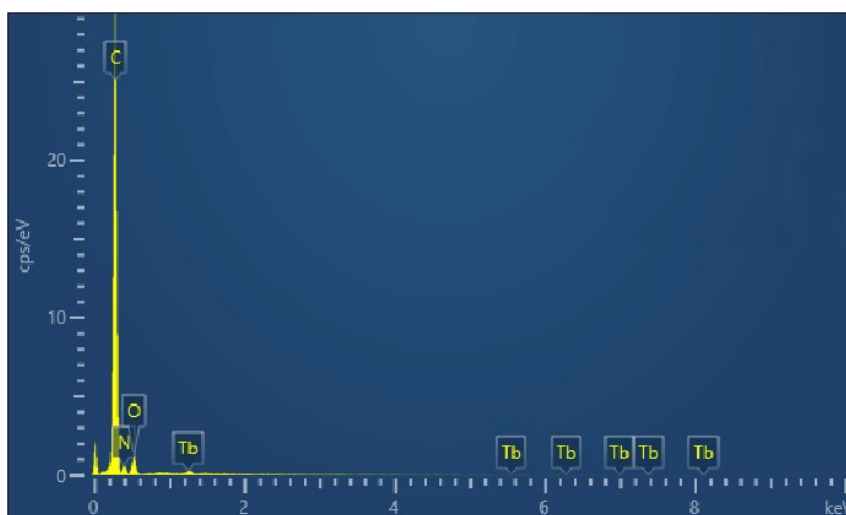

| Element | Wt % | Wt% Sigma |
|---------|------|-----------|
| C       | 76.9 | 0.7       |
| N       | 12.5 | 0.7       |
| O       | 8.4  | 0.3       |
| Tb      | 2.3  | 0.3       |

**Fig. S4** EDS analysis of Tb@1.

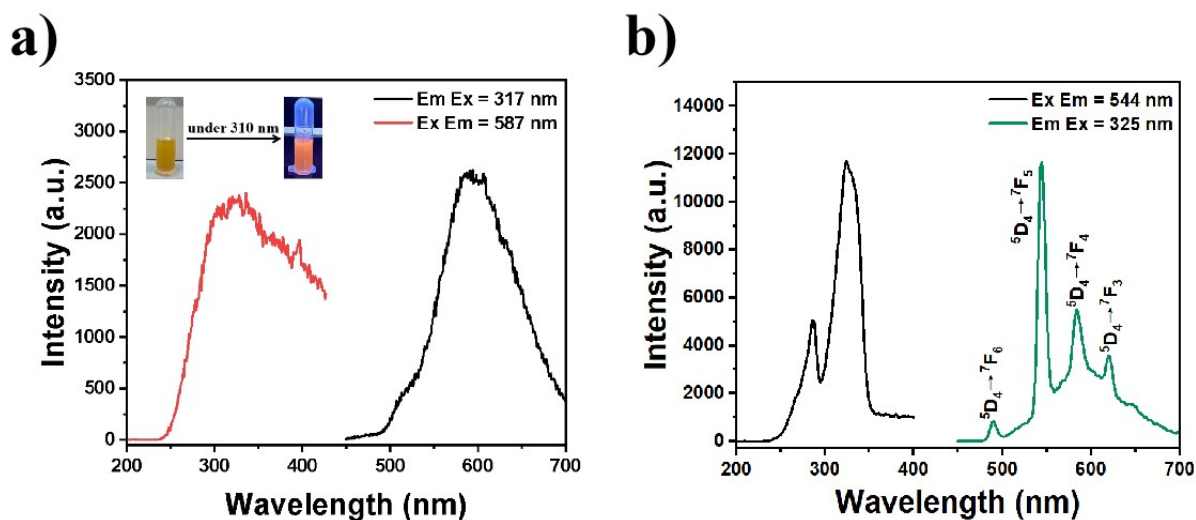

Fig. S5 a) Excitation and emission spectra of TpTta; b) Excitation and emission spectra of Tb@1.

Excitation energies and oscillator strengths:

```
Excited State 1:      Triplet-A      2.9647 eV  418.20 nm  f=0.0000  <S**2>=2.000
 53 -> 67            -0.10432
 54 -> 66            -0.11287
 56 -> 63            -0.10522
 58 -> 63             0.23780
 58 -> 65             0.10215
 61 -> 62             0.61781
```

This state for optimization and/or second-order correction.

Total Energy, E(TD-HF/TD-KS) = -742.435927132

Copying the excited state density for this state as the 1-particle RhoCI density.

```
Excited State 2:      Triplet-A      3.2590 eV  380.44 nm  f=0.0000  <S**2>=2.000
 57 -> 63             0.15386
 59 -> 62             0.13973
 59 -> 64             0.10637
 60 -> 63             0.64464
```

```
Excited State 3:      Triplet-A      3.5250 eV  351.73 nm  f=0.0000  <S**2>=2.000
 57 -> 64            -0.13395
 59 -> 63             0.39173
 59 -> 65            -0.11973
 60 -> 62             0.50367
 60 -> 64             0.18429
```

SaveTr: write IOETrn= 770 NScale= 10 NData= 16 NLR=1 NState= 3 LETran= 62.

\*\*\*\*\*

Fig. S6 The result of Gaussian calculation of Terpy.

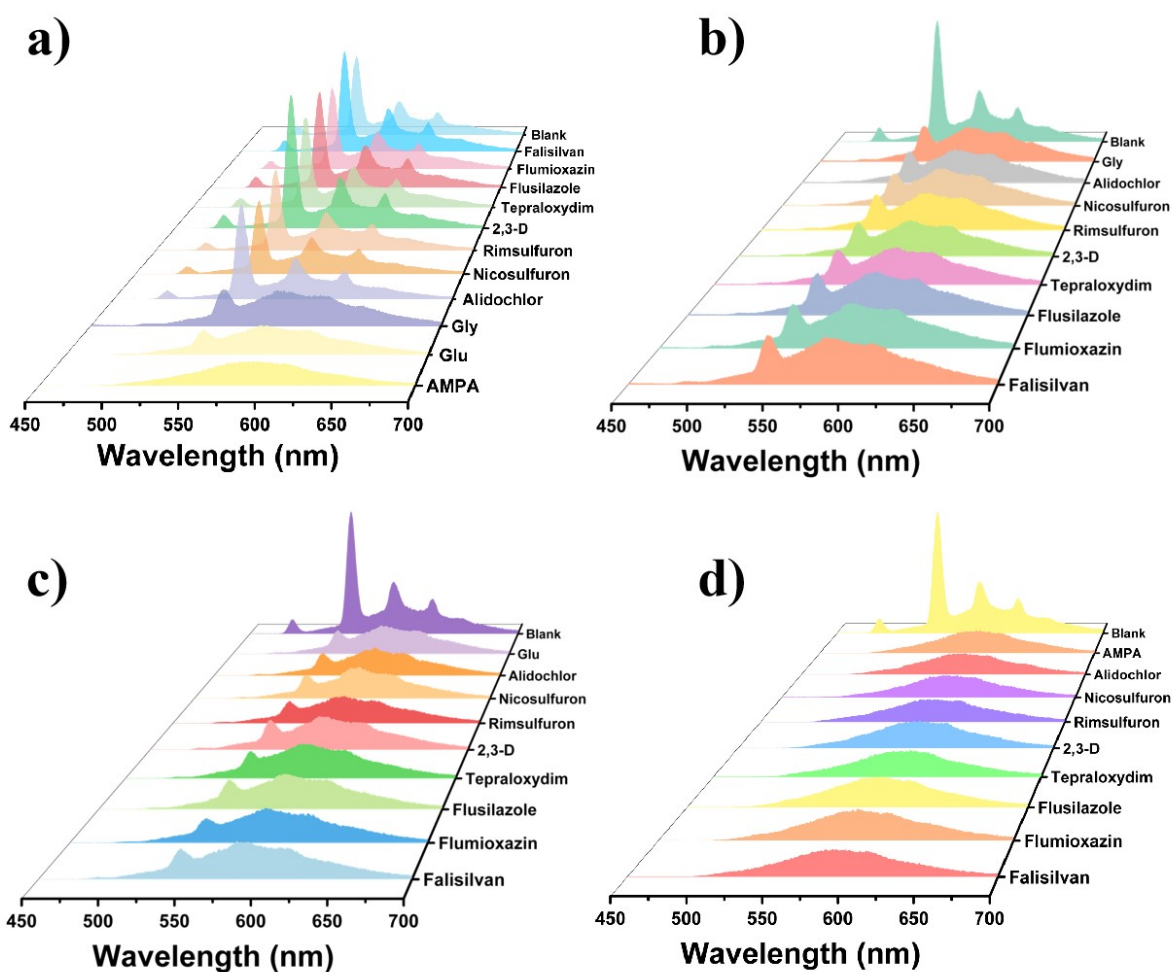

**Fig. S7** Emission spectra of the luminescence response of Tb@1 toward Gly, Glu and AMPA in the absence and presence of other herbicides.

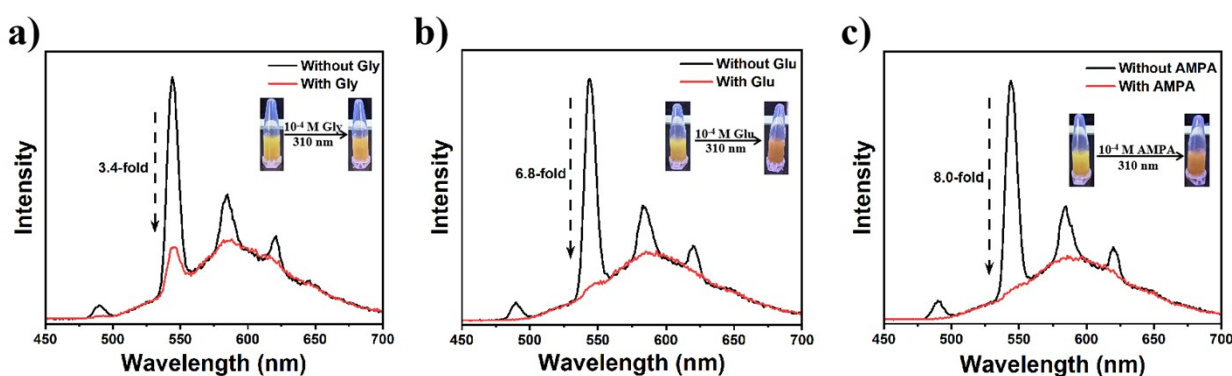

**Fig. S8** Fluorescence spectra of Tb@1 a) with and without  $10^{-4}$  M Gly; b) with and without  $10^{-4}$  M Glu; c) with and without  $10^{-4}$  M AMPA ( $\lambda_{\text{ex}} = 325$  nm).

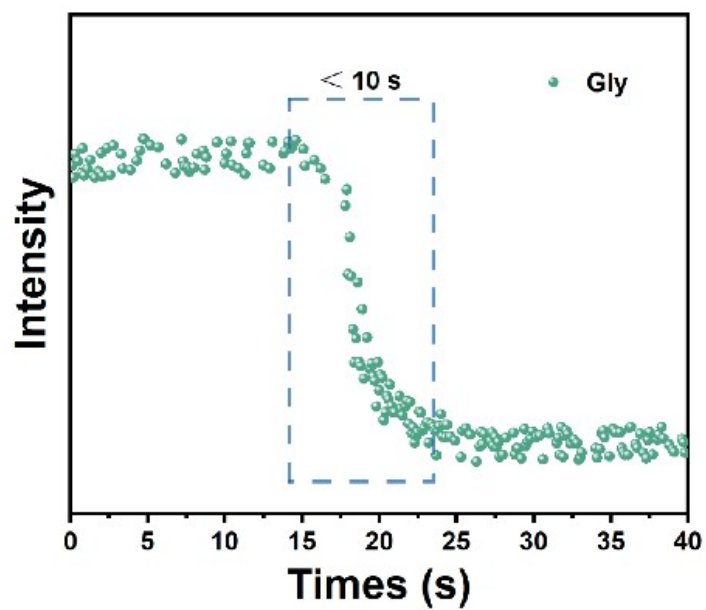

**Fig. S9** Response time of Tb@1 to Gly.

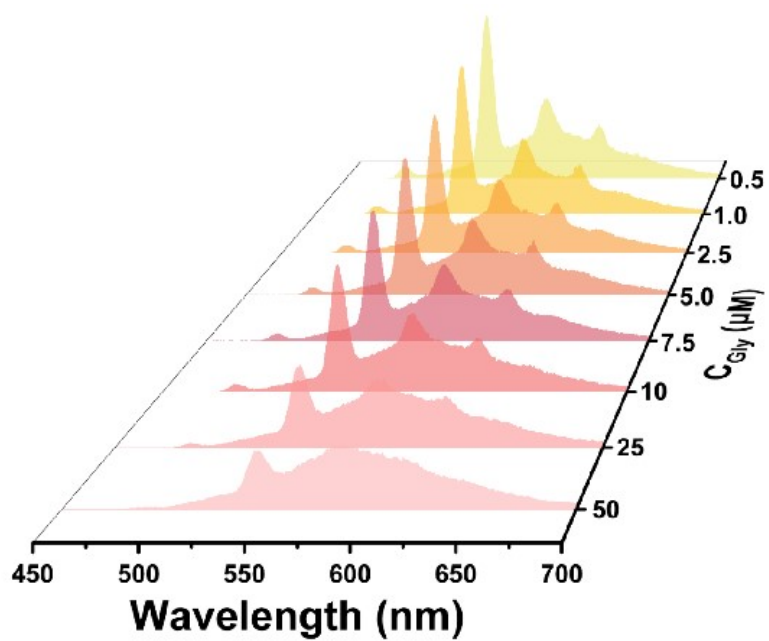

**Fig. S10** The emission spectra of Tb@1 upon the gradual addition of Gly.



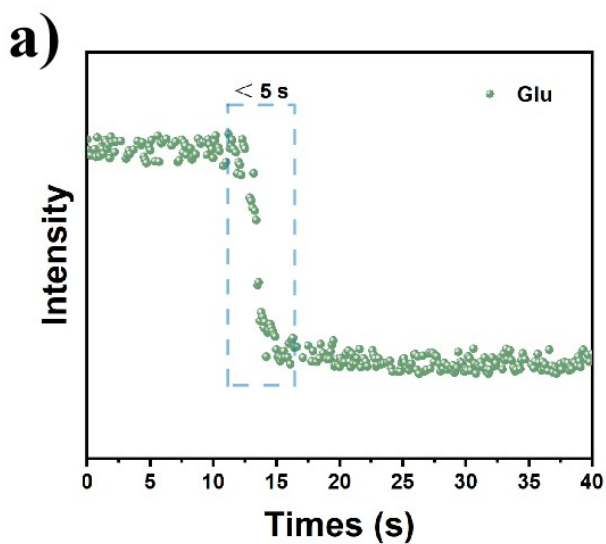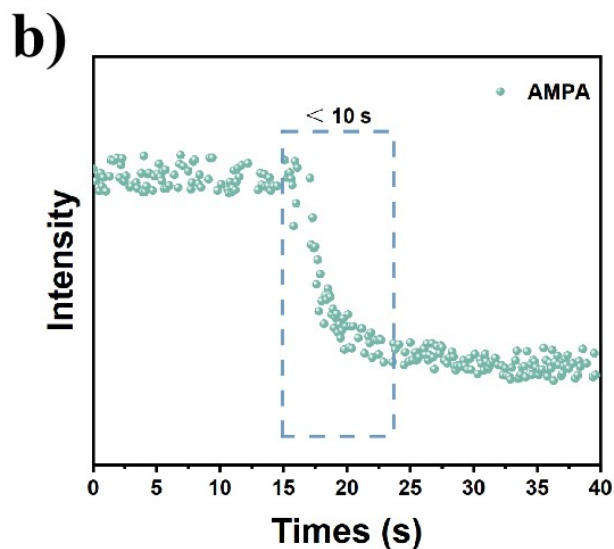

**Fig. S11** Response time of Tb@1 to a) Glu; b) AMPA.

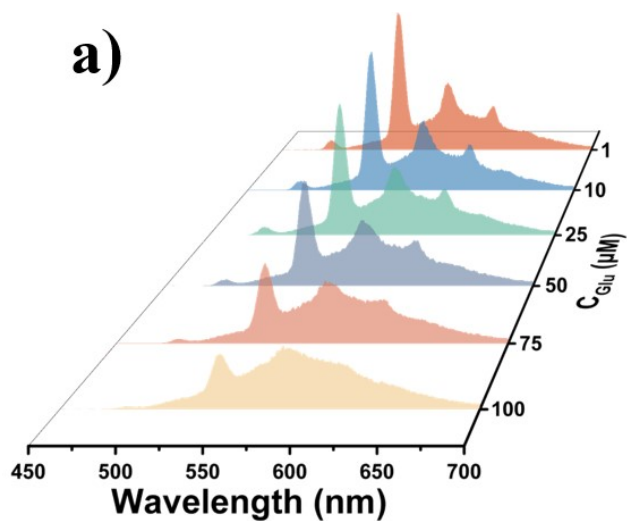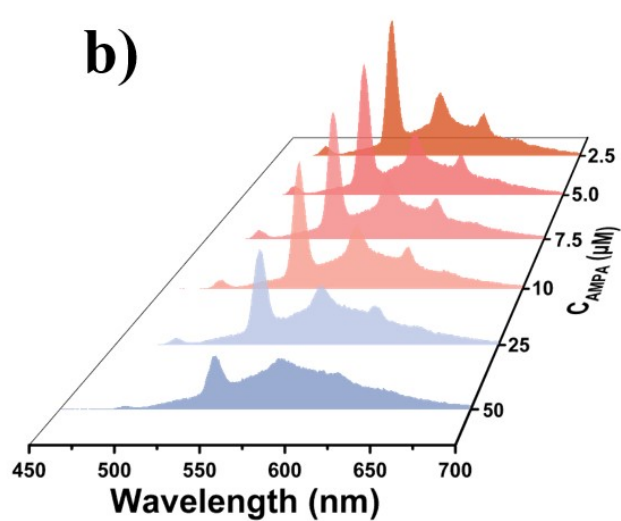

**Fig. S12** The emission spectra of Tb@1 upon the gradual addition of a) Glu; b) AMPA.

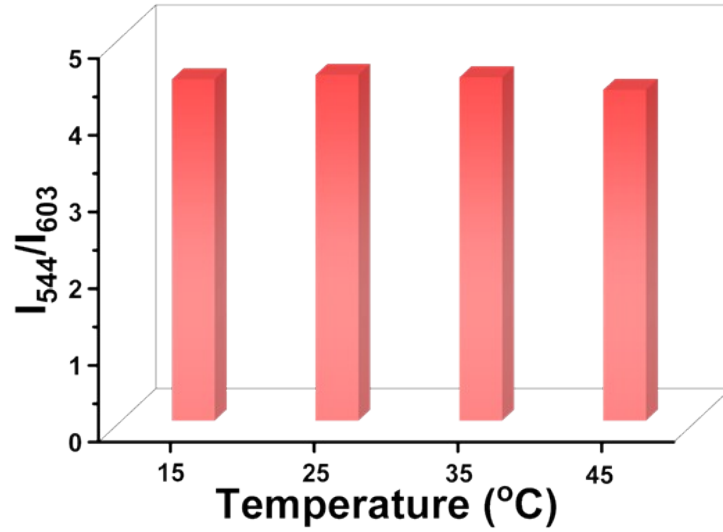

**Fig. S13** Variation of fluorescence intensity ratio of Tb@1 at different temperatures.

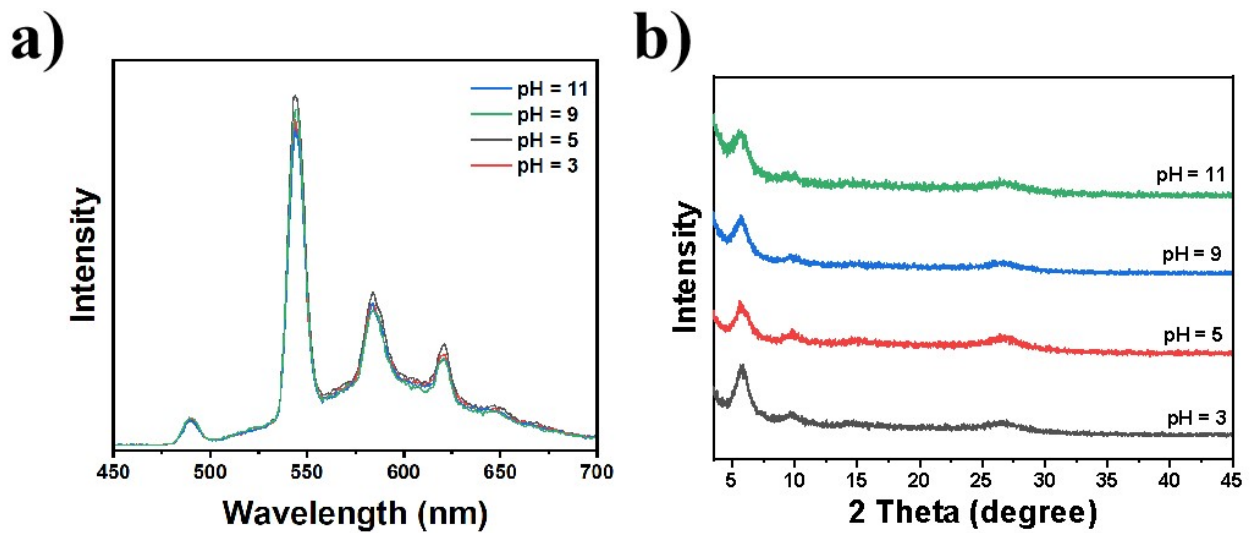

**Fig. S14** a) Variation of fluorescence intensity of Tb@1 and b) PXRD patterns of Tb@1 after soaking in different pH solutions for 24 h.

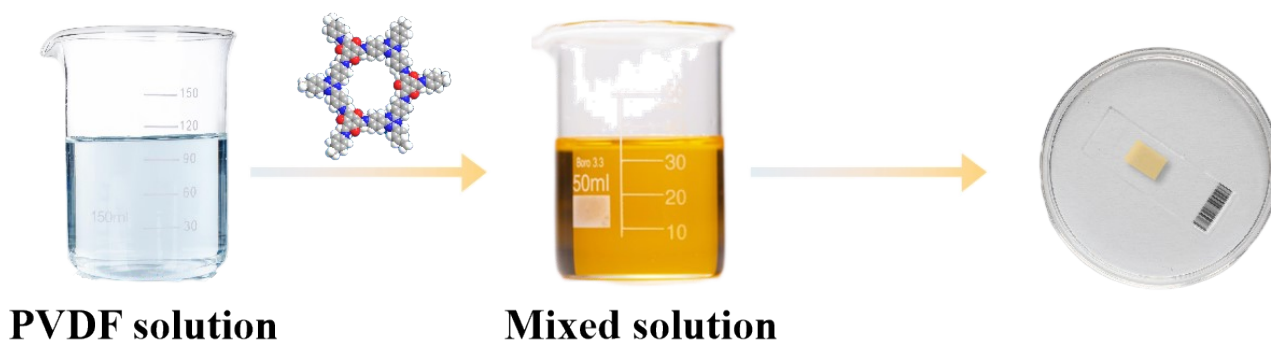

**Fig. S15** Sketching map of synthetic process of thin film.

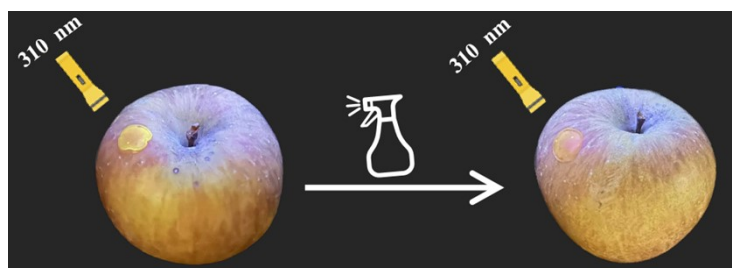

**Fig. S16** Rapid and visible imaging of AMPA applied on the surface of apple produce.

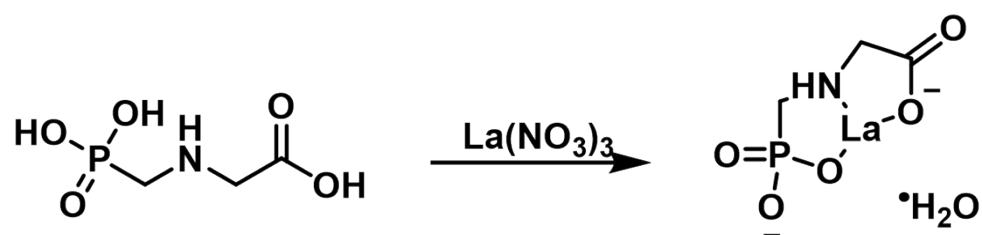

**Scheme S1** Reaction of Gly and  $\text{La}(\text{NO}_3)_3$ .

**Table S1** Summary of the methods for sensing Gly, Glu and AMPA

| Analyte     | Method                           | Linear range/ $\mu\text{M}$ | LOD/ $\mu\text{M}$ | Ref              |
|-------------|----------------------------------|-----------------------------|--------------------|------------------|
| Gly         | Capillary Electrophoresis        | 1.5–300                     | 0.8                | [S2]             |
| Gly         | Fluorescence                     | 11.83–118.3                 | 0.61               | [S3]             |
| Gly         | Fluorescence (CDs)               | 2.0–20                      | 0.6                | [S4]             |
| Gly         | capillary electrophoresis        | 13–1600                     | 1.2                | [S5]             |
| Gly         | ICP-MS                           | 0.5–20                      | 0.6                | [S6]             |
| Gly         | MSPE-HPLC                        | 0.43–11.83                  | 0.124              | [S7]             |
| Gly         | Surface Plasmon Resonance Sensor | 0–0.59                      | 0.008              | [S8]             |
| <b>Gly</b>  | <b>Fluorescence</b>              | <b>0.5–50</b>               | <b>0.033</b>       | <b>This work</b> |
| Glu         | Capillary Electrophoresis        | 1.5–300                     | 0.8                | [S2]             |
| Glu         | capillary electrophoresis        | 6–1970                      | 0.6                | [S5]             |
| Glu         | ICP-MS                           | 2.4–20                      | 3.9                | [S6]             |
| Glu         | MSPE-HPLC                        | 0.35–9.29                   | 0.105              | [S7]             |
| Glu         | Fluorescence                     | 4.65–116.18                 | 0.05               | [S9]             |
| <b>Glu</b>  | <b>Fluorescence</b>              | <b>1–100</b>                | <b>0.11</b>        | <b>This work</b> |
| AMPA        | Capillary Electrophoresis        | 1.5–300                     | 0.9                | [S2]             |
| AMPA        | capillary electrophoresis        | 38–1890                     | 1.7                | [S5]             |
| AMPA        | ICP-MS                           | 2.2–20                      | 6.3                | [S6]             |
| AMPA        | MSPE-HPLC                        | 0.66–18.01                  | 0.198              | [S7]             |
| <b>AMPA</b> | <b>Fluorescence</b>              | <b>2.5–50</b>               | <b>0.26</b>        | <b>This work</b> |

## References

- [S1] W. Li, C. Yang and X. Yan, *Chemical Communications*, 2017, **53**, 11469-11471.
- [S2] S. Chang and M. Wei, *J. Chin. Chem. Soc.*, 2005, **52**, 785-792.
- [S3] Q. Li, Y. Guo, X. He and G. Li, *Talanta*, 2023, **265**, 124865.
- [S4] Y. Yuan, J. Jiang, S. Liu, J. Yang, H. zhang, J. Yan and X. Hu, *Sens. Actuators B Chem.*, 2017, **242**, 545-553.
- [S5] S. Chang and C. Liao, *J. Chromatogr. A*, 2002, **959**, 309-315.
- [S6] Y. Kazui, Y. Seto and H. Inoue, *Forensic Toxicol.*, 2014, **32**, 317-322.
- [S7] N. Surapong and R. Burakham, *ACS Omega*, 2021, **6**, 27007-27016.
- [S8] M. H. Do, B. Dubreuil, J. Peydecastaing, G. Vaca-Medina, T. T. Nhu-Trang, N. Jaffrezic-Renault and P. Behra, *Sensors* 2020, **20**, 5942
- [S9] F. Y. Zhu, J. Zhu and Z. Z. Zhang, *RSC Adv.*, 2017, **7**, 48077-48082.
